# Supplementary material
Source: publisher figshare collection journal article supplement (https://adisjournals.figshare.com/ndownloader/files/27573329)
Supplement: Supplementary file 1 [file 27573329]

## Comprehensive Approach to Management of Multiple Sclerosis: Addressing Invisible Symptoms—A Narrative Review

Lynsey Lakin, Bryan E Davis, Cherie C Binns, Keisha M Currie, Mary R Rensel

The authors of this work include **people living with MS** and **healthcare providers**, working towards a common goal of **raising awareness of the invisible symptoms of MS**

### What are the invisible symptoms of MS?

People living with MS often experience ‘invisible symptoms’—symptoms which are not easily visible to others. These most frequently include:

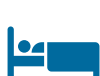

Fatigue

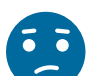

Mood  
changes

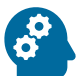

Cognitive  
changes

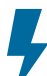

Physical &  
emotional  
pain

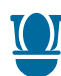

Bowel &  
bladder  
problems

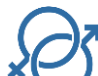

Sexual  
dysfunction

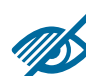

Vision  
changes

### How can patients work together with providers to detect and monitor invisible symptoms?

**Tell your MS care  
providers about all  
symptoms**

**Discuss the  
routine use of  
screening tools**

**Actively engage  
with your provider  
at all stages of care**

### What can you do to manage invisible symptoms?

#### Maintenance of psychosocial well-being

- Nurture relationships that support personal, spiritual, and emotional aspects of life
- Join peer support group(s) to normalize life with MS

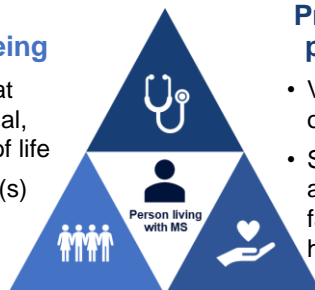

#### Preventative visits with primary care provider

- Visit annually for prevention of problems
- Schedule additional visits as needed to manage risk factors, obesity, and obtain health screens

#### Self-empowered choices which support health

- Learn about invisible symptoms
- Maintain a nutritious diet
- Incorporate exercise/mindful movement into routine
- Quit smoking and limit sugary foods

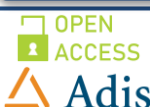

PEER-REVIEWED  
INFOGRAPHIC

This is a summary of a peer-reviewed article published in *Neurology and Therapy*, 2021. DOI: 10.1007/s40120-021-00239-2

This plain language summary represents the opinions of the authors. For a full list of declarations, including funding and author disclosure statements, please see the full text online. © The authors, CC-BY-NC 2021. Prepared by Meredith Whitaker, PhD, Alphabet Health. Plain language services were funded by Novartis. The original authors of the manuscript reviewed this summary.
